# Supplementary material for: A magnetic X-band frequency microwave nanoabsorbent made of iron oxide/halloysite nanostructures combined with polystyrene
Source: Royal Society of Chemistry journal article supplement (doi:10.1039/d2ra08339f), 2023-01-01
Supplement: d2ra08339f1.pdf [file d2ra08339f1.pdf]

## A Magnetic X-Band Frequency Microwave Nanoabsorbent Made of Iron Oxide/Halloysite Nanostructures Combined with Polystyrene

Diana Fallah Jelodar<sup>1</sup>, Mojtaba Rouhi<sup>2</sup>, Reza Taheri-Ledari<sup>1</sup>, Zoleikha Hajizadeh<sup>1</sup>, Ali Maleki<sup>\*,1</sup>

<sup>1</sup>*Catalysts and Organic Synthesis Research Laboratory, Department of Chemistry, Iran University of Science and Technology, Tehran16846-13114, Iran.*

<sup>2</sup>*Department of Physics, Iran University of Science and Technology, Tehran16846-13114, Iran.*

\*Corresponding author. (Ali Maleki) E-mail: [maleki@iust.ac.ir](mailto:maleki@iust.ac.ir); Fax: +98-21-73021584; Tel: +98-21-73228313.

 Author's ORCIDs:

Reza Taheri-Ledari: <https://orcid.org/0000-0002-6511-9411>

Ali Maleki: <https://orcid.org/0000-0001-5490-3350>

---

### Table of Content

| Content                                                                       | Page |
|-------------------------------------------------------------------------------|------|
| <b>Figure S1.</b> XRD pattern of the neat Fe <sub>3</sub> O <sub>4</sub> NPs. | S2   |
| <b>Figure S2.</b> SEM image of the neat Fe <sub>3</sub> O <sub>4</sub> NPs.   | S3   |
| <b>Figure S3.</b> DLS curve of the neat Fe <sub>3</sub> O <sub>4</sub> NPs.   | S4   |

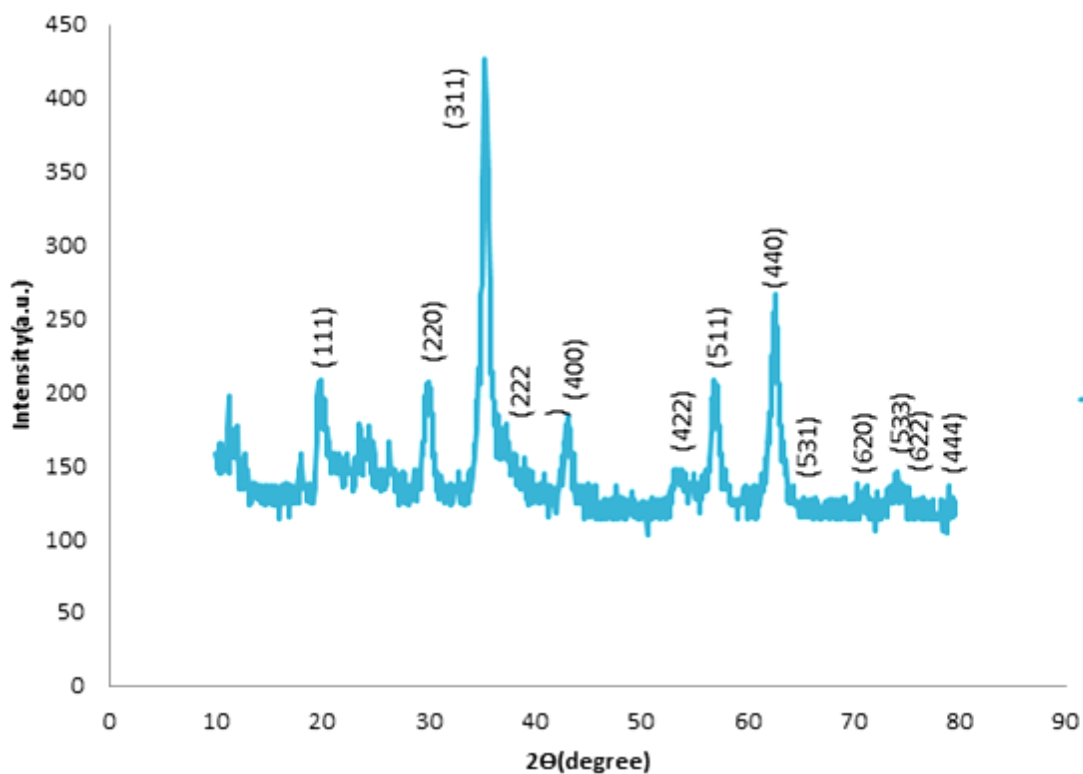

**Figure S1.** XRD pattern of the neat Fe<sub>3</sub>O<sub>4</sub> NPs.

The crystal structure of the neat Fe<sub>3</sub>O<sub>4</sub> NPs was studied by the X-ray diffraction (XRD) analysis. It can be seen that the diffraction peaks of the Fe<sub>3</sub>O<sub>4</sub> NPs are well confirmed by the reference JCPDS card (NO. 00-024-0072);  $2\theta = 33.115^\circ, 35.612^\circ, 54.005^\circ, 57.508^\circ, 62.385^\circ, 63.966^\circ, \text{ and } 75.409^\circ$ .

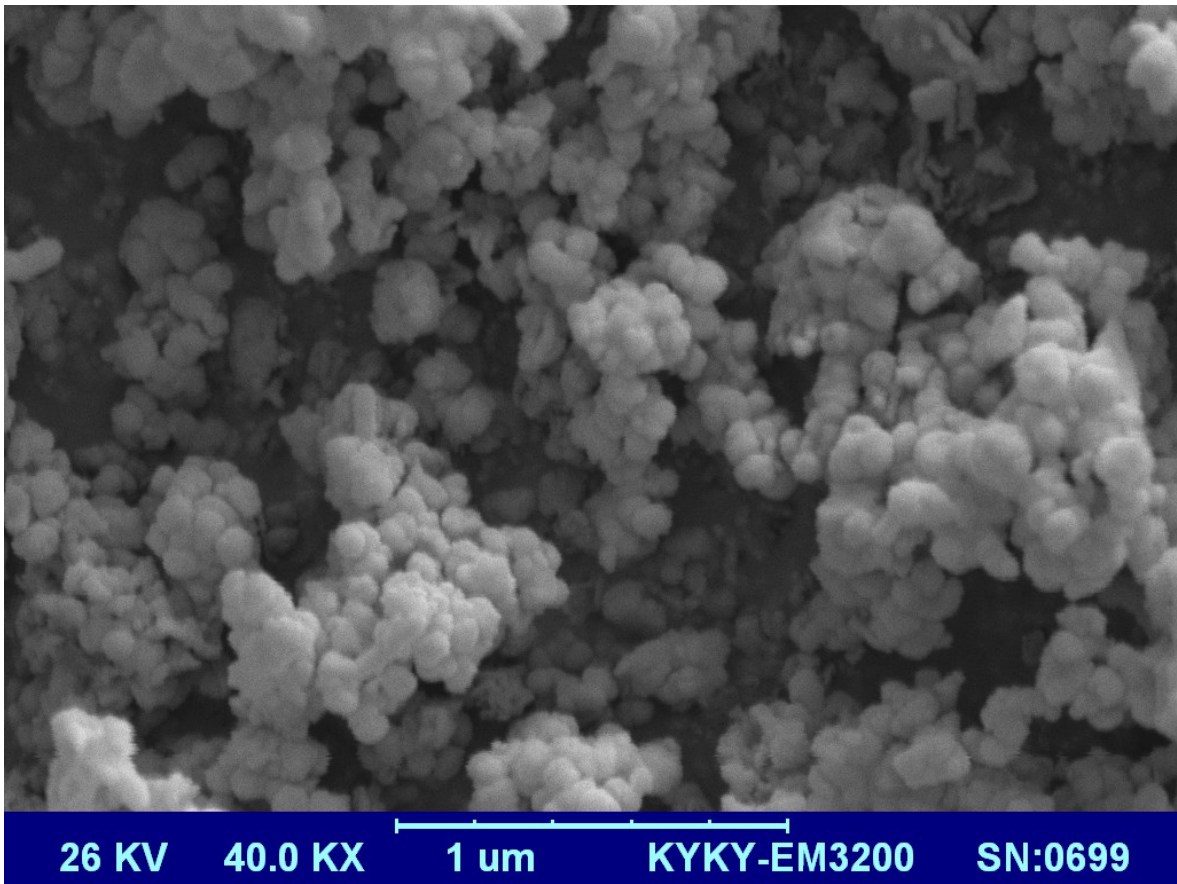

**Figure S2.** SEM image of the neat Fe<sub>3</sub>O<sub>4</sub> NPs.

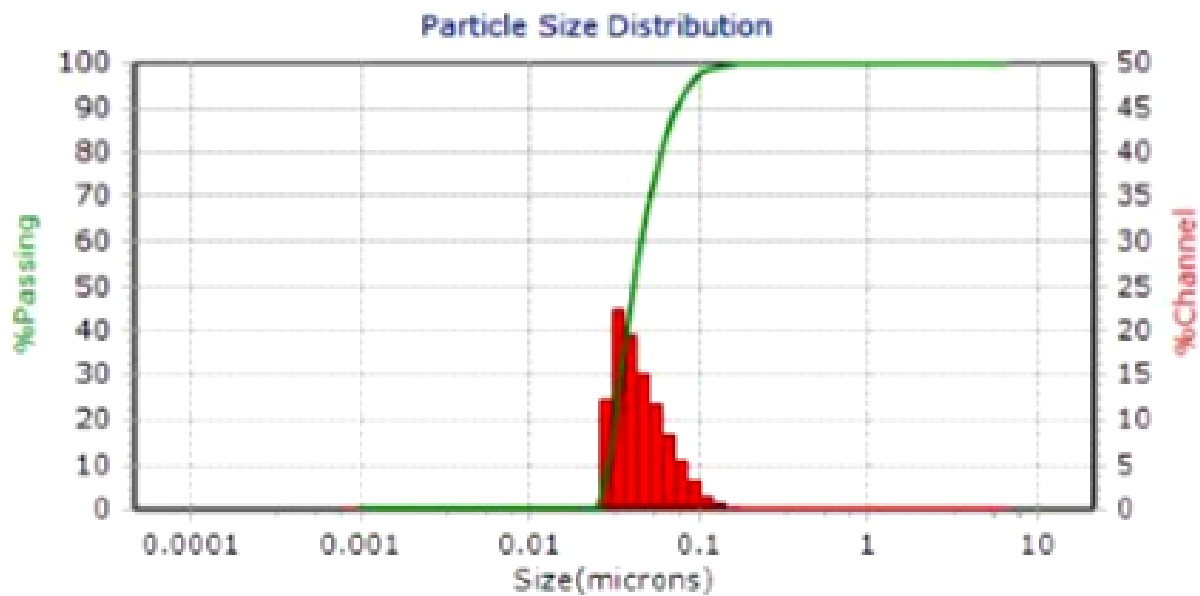

**Figure S3.** DLS curve of the neat Fe<sub>3</sub>O<sub>4</sub> NPs.

Dynamic Light Scattering (DLS) analysis of the neat Fe<sub>3</sub>O<sub>4</sub> NPs is shown in Figure S3. Mean particle size in the colloidal state was recorded for this sample is the between 0.04 - 0.1 microns (40-100 nm).
